# Supplementary material for: Synthesis and characterization of (E)-4-((anthracen-9-ylmethylene) amino)-N- (pyridin-2-yl) benzenesulfonamide and its metal complexes: Evaluation of potential against the colon cancer cell line COLO-205 and biological activity profiles
Source: Research Square preprint supplement (doi:10.21203/rs.3.rs-3435682/v1), 2023-10-16
Supplement: Supplementary file 1 [file 4481be38d0d5c7ec33f731fe.docx]

**Synthesis and characterization of (E)-4-((anthracen-9-ylmethylene) amino)-N-(pyridin-2-yl) benzenesulfonamide and its metal complexes: Evaluation of potential against the colon cancer cell line COLO-205 and biological activity profiles**

P. Jona1*, P.S. Suja Pon Mini1, N. Suman1, S. Robinson1, S. Amutha1 and P. Ram Kumar2*

*1Department of Chemistry, Francis Xavier Engineering College, Vannarpet, Tirunelveli- 627003*

*2Department of Chemistry, Lord Jegannath College of Engineering and Technology, Nagercoil, Kanyakumari 629402, India*

Corresponding authors E-mail: [jona@francisxavier.ac.in](file:///E:\paper%20work\schiff%20base\jona%20mam\final\jona@francisxavier.ac.in%20) (P. Jona)

[dr.ramchem93@gmail.com](file:///D:\paper%20work\Ani\FINAL\final%20submission\revision\dr.ramchem93@gmail.com) (P. Ram Kumar)


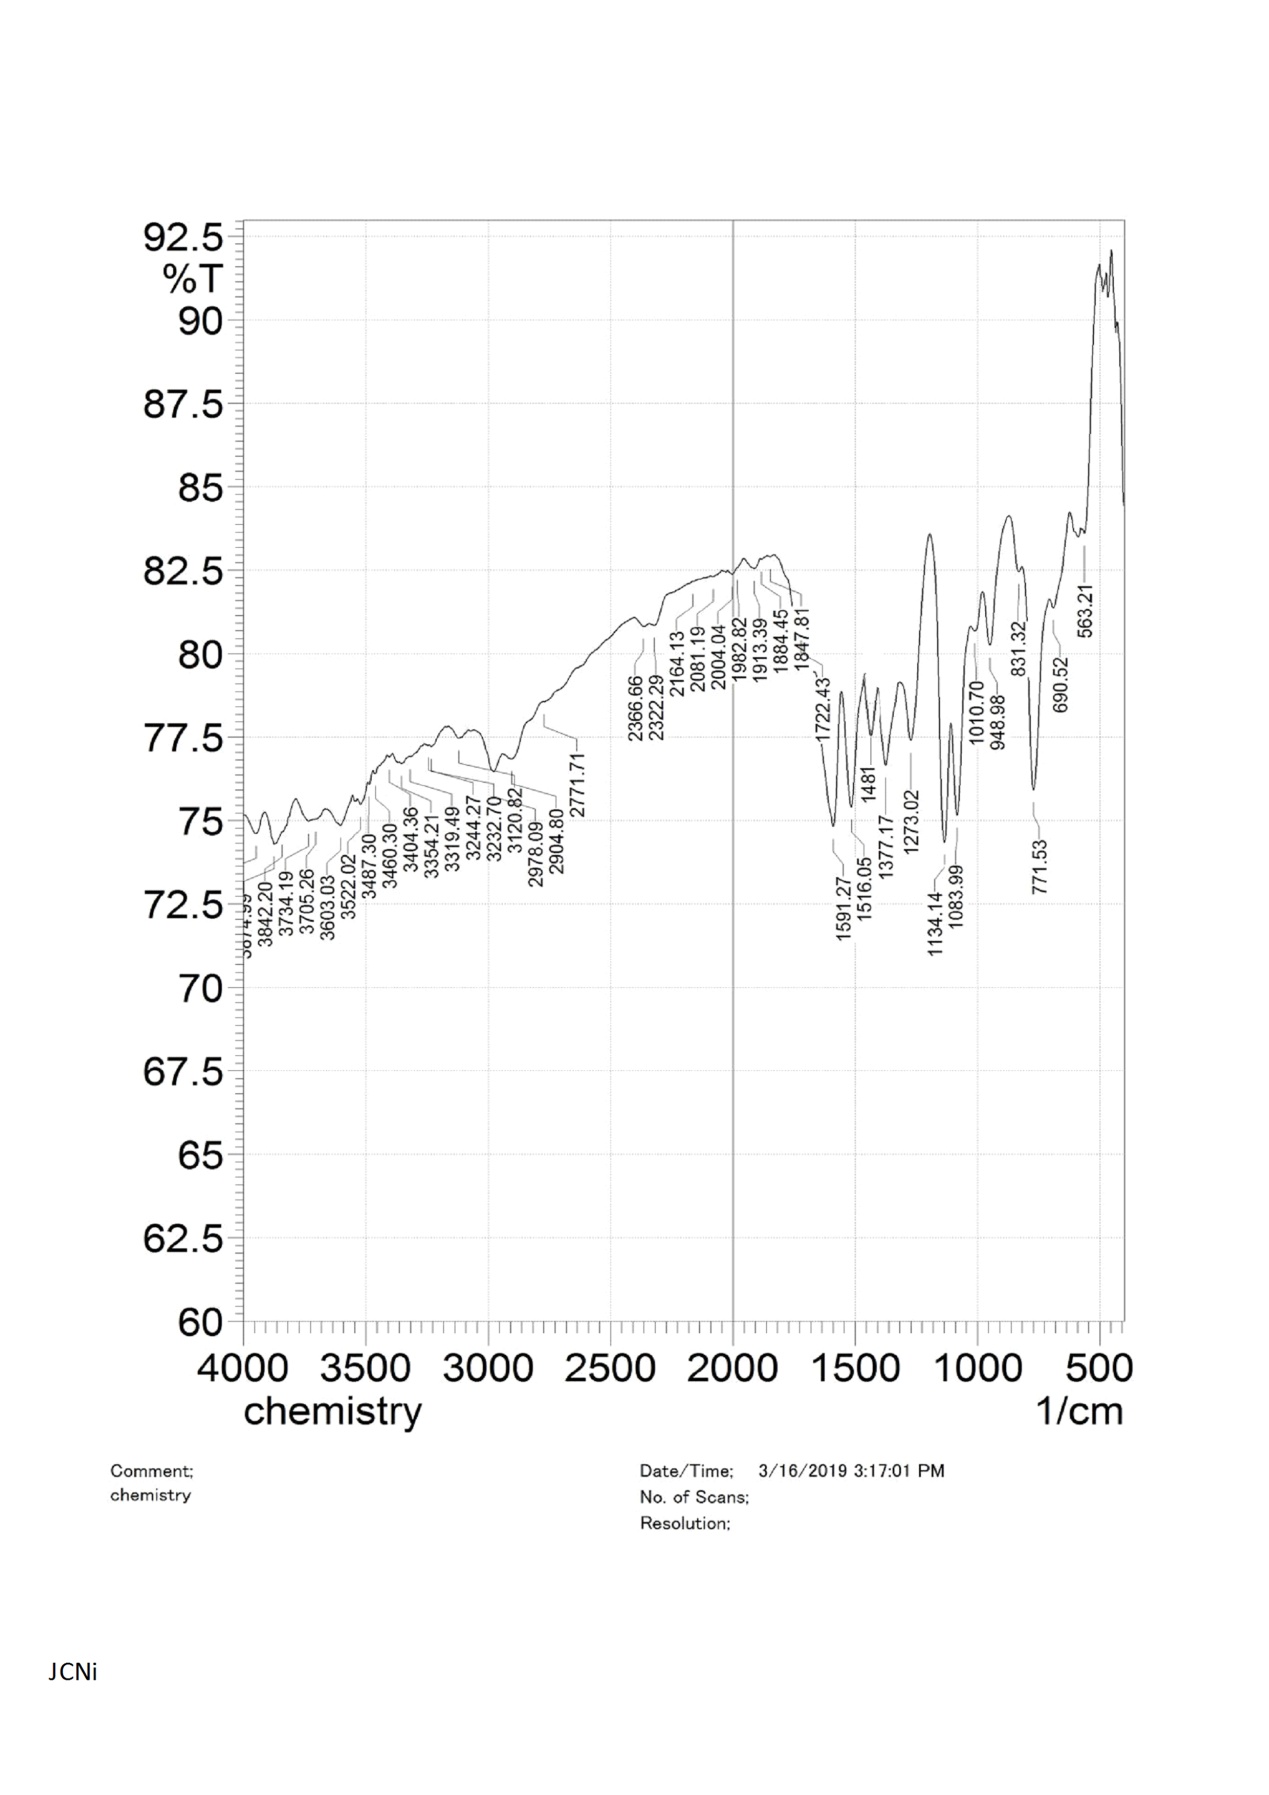


**Fig. S1** FT-IR spectrum of the Schiff base ligand (SPA)


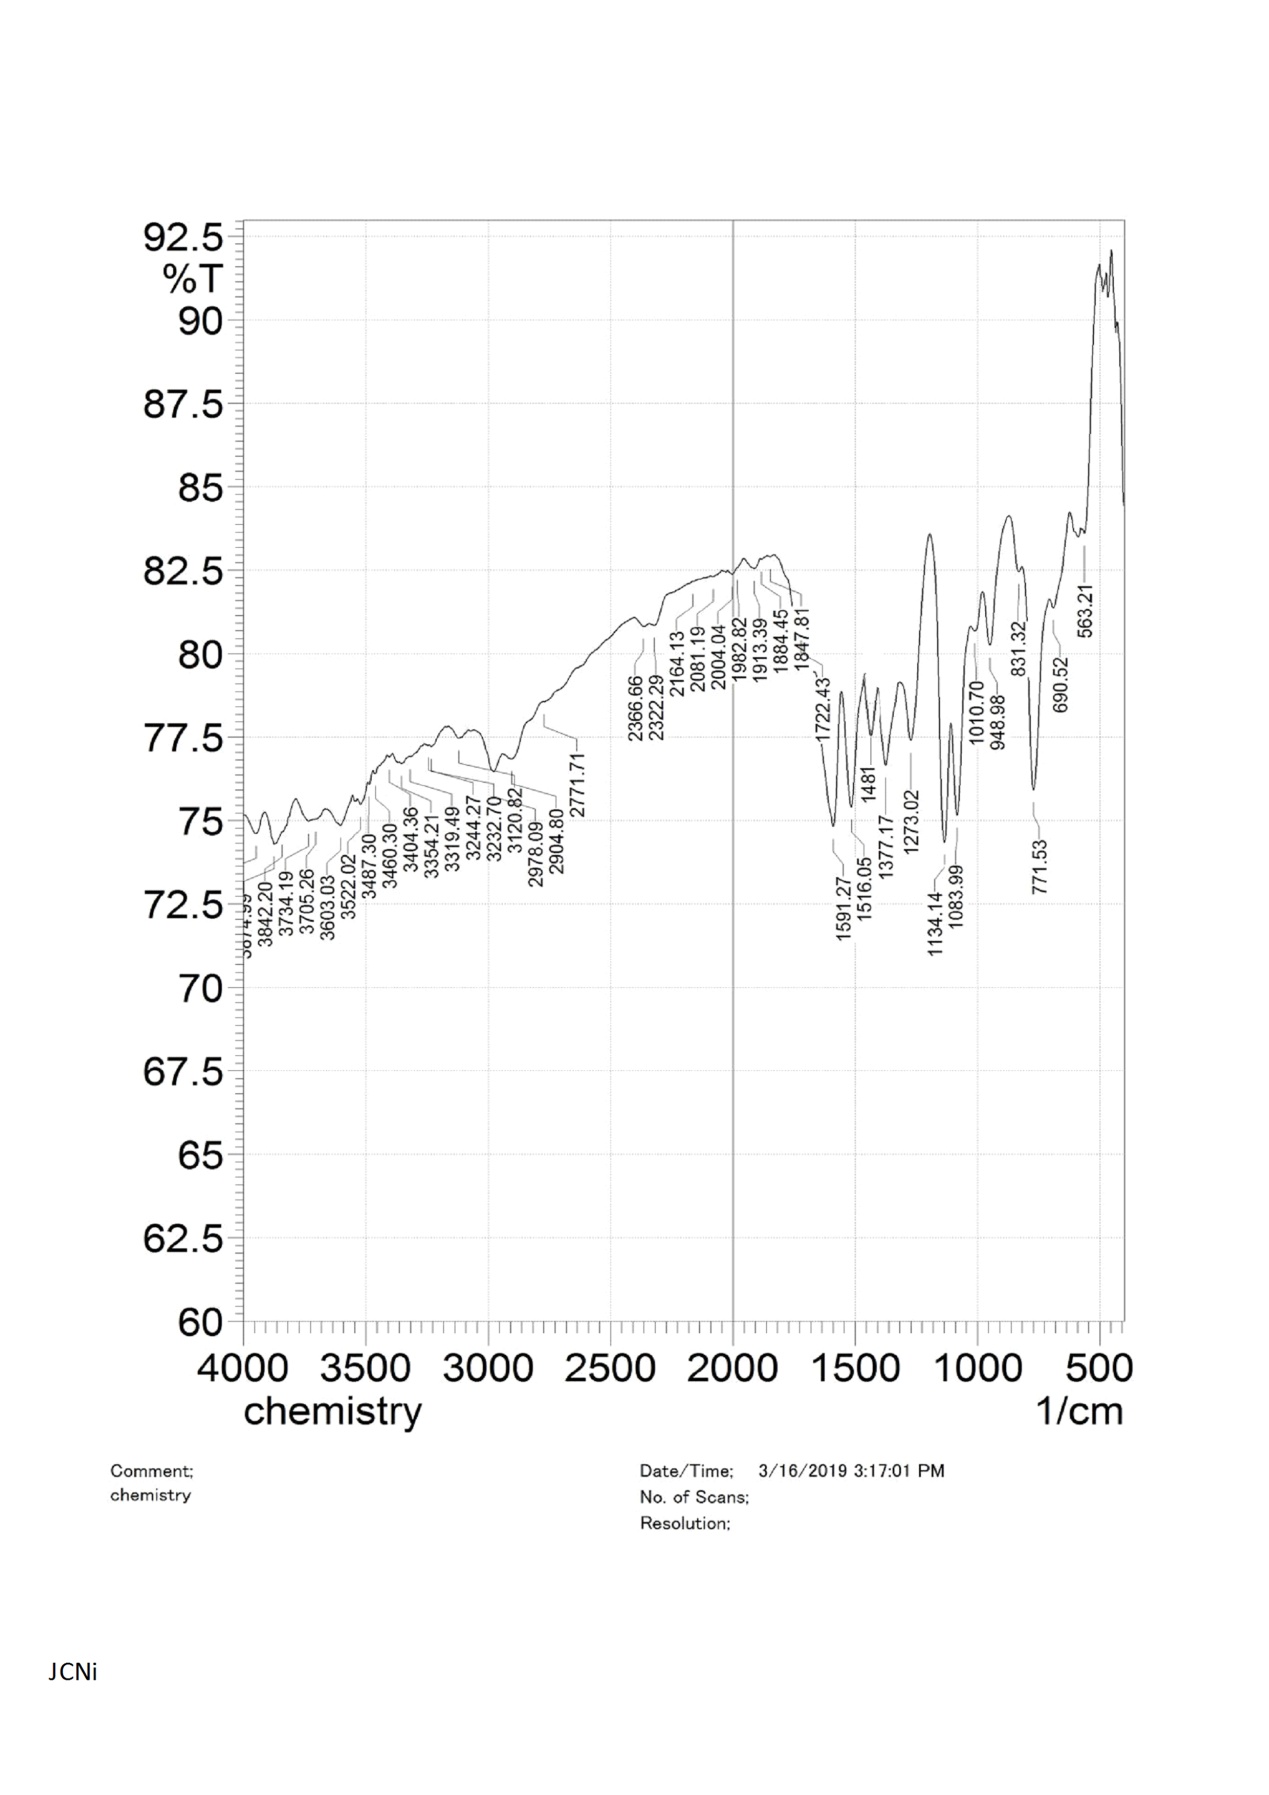


**Fig. S2** FT-IR spectrum of [Mn(SPA)2 (NO3)2] complex


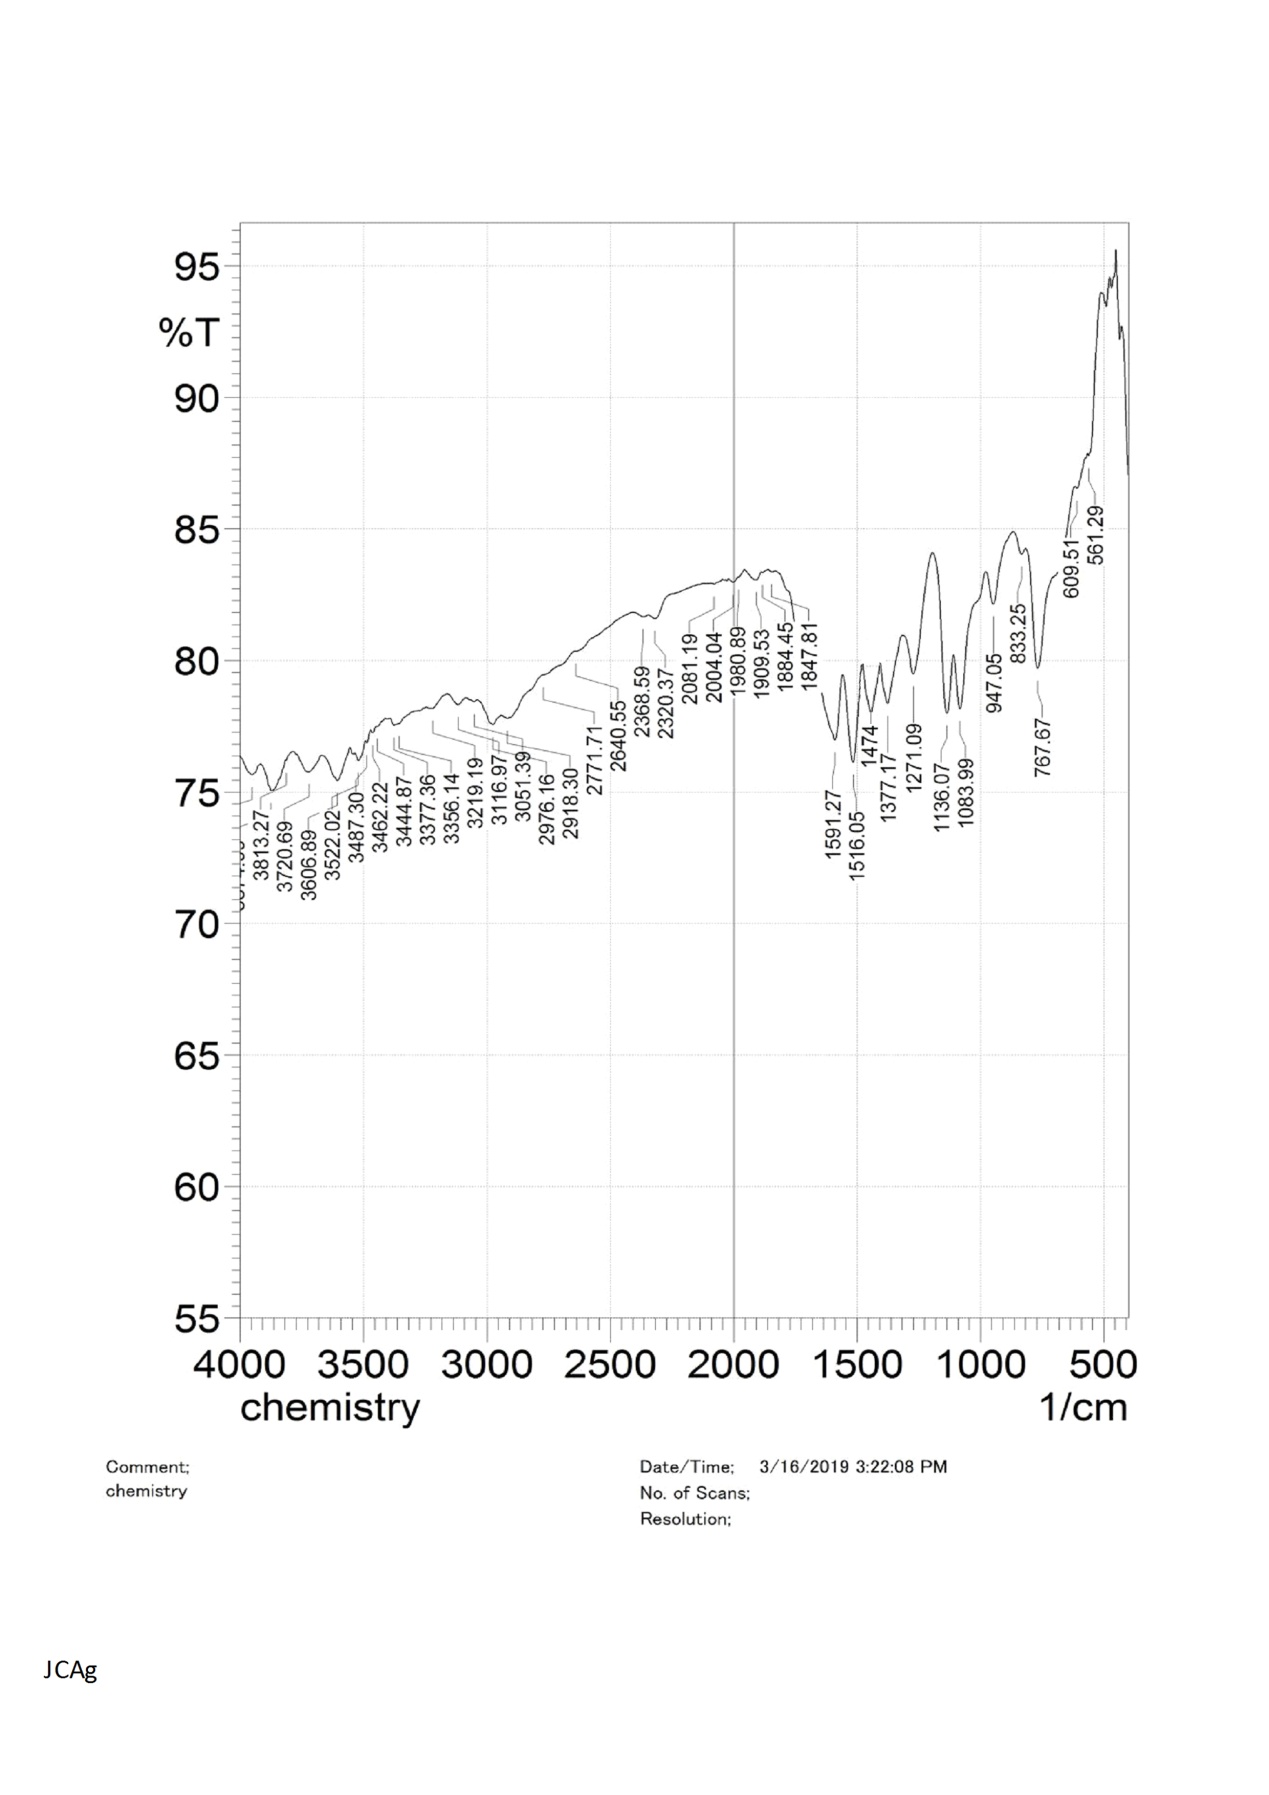


**Fig. S3** FT-IR spectrum of [Co(SPA)2(NO3)2] complex


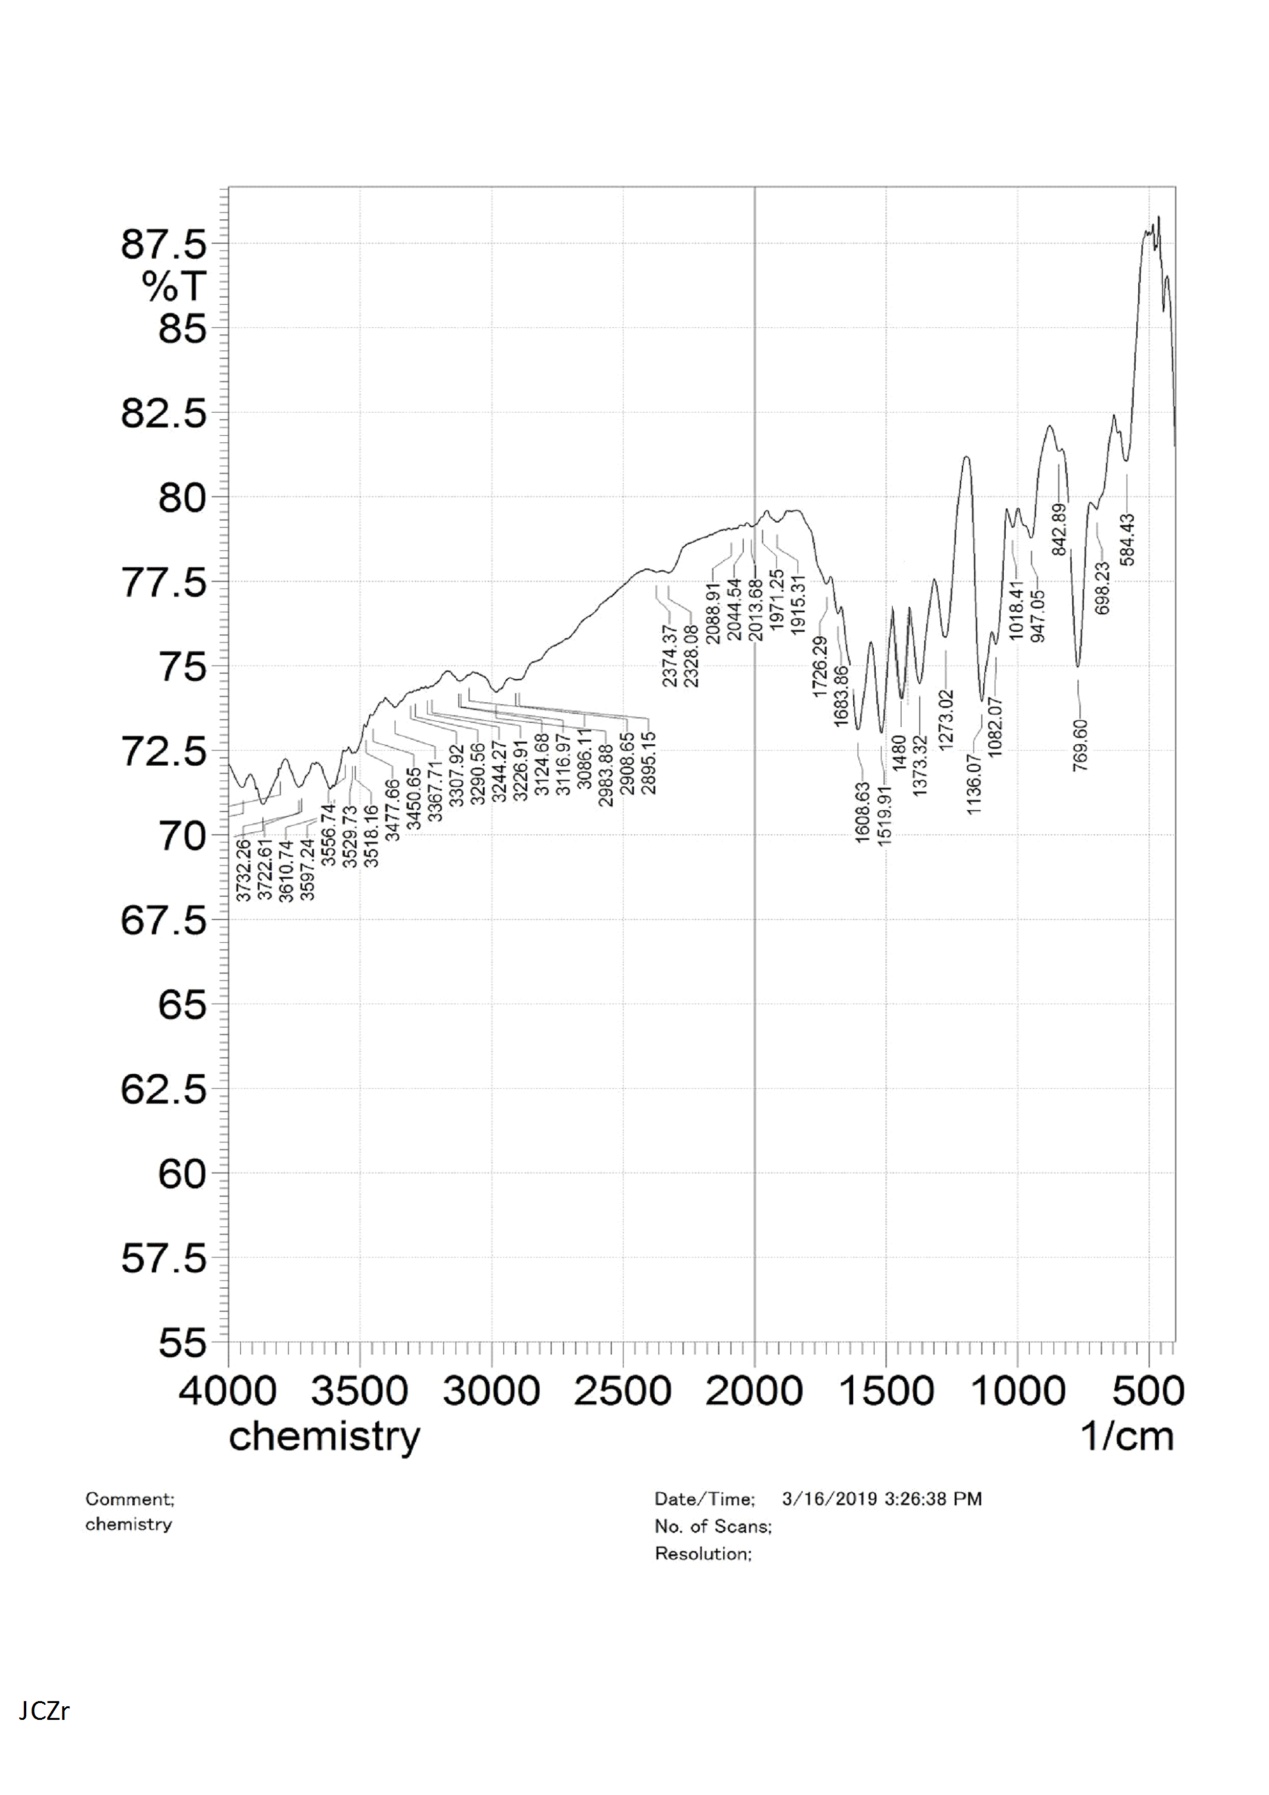


**Fig. S4** FT-IR spectrum of [Ni(SPA)2(NO3)2] complex


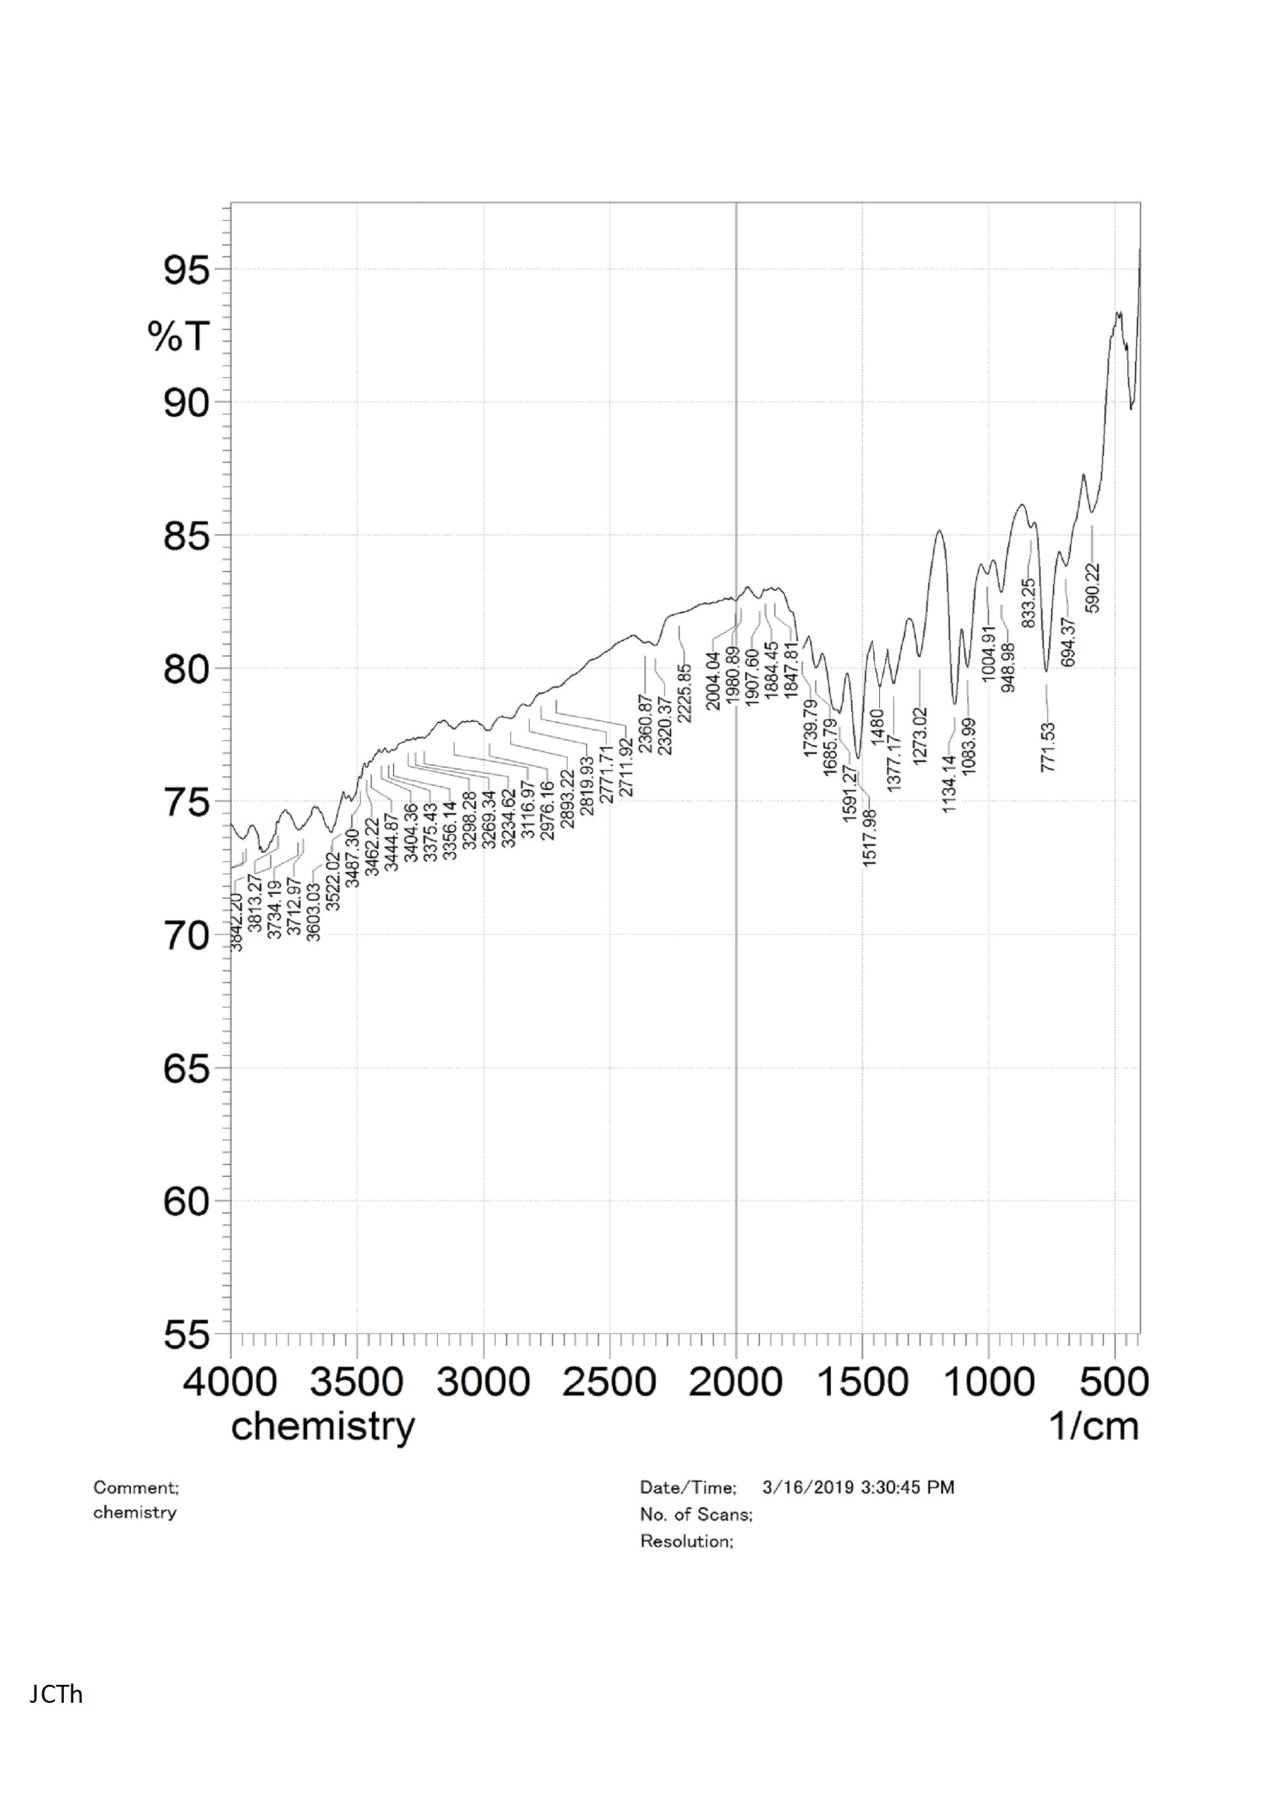


**Fig. S5** FT-IR spectrum of [Cu(SPA)2(NO3)2] complex


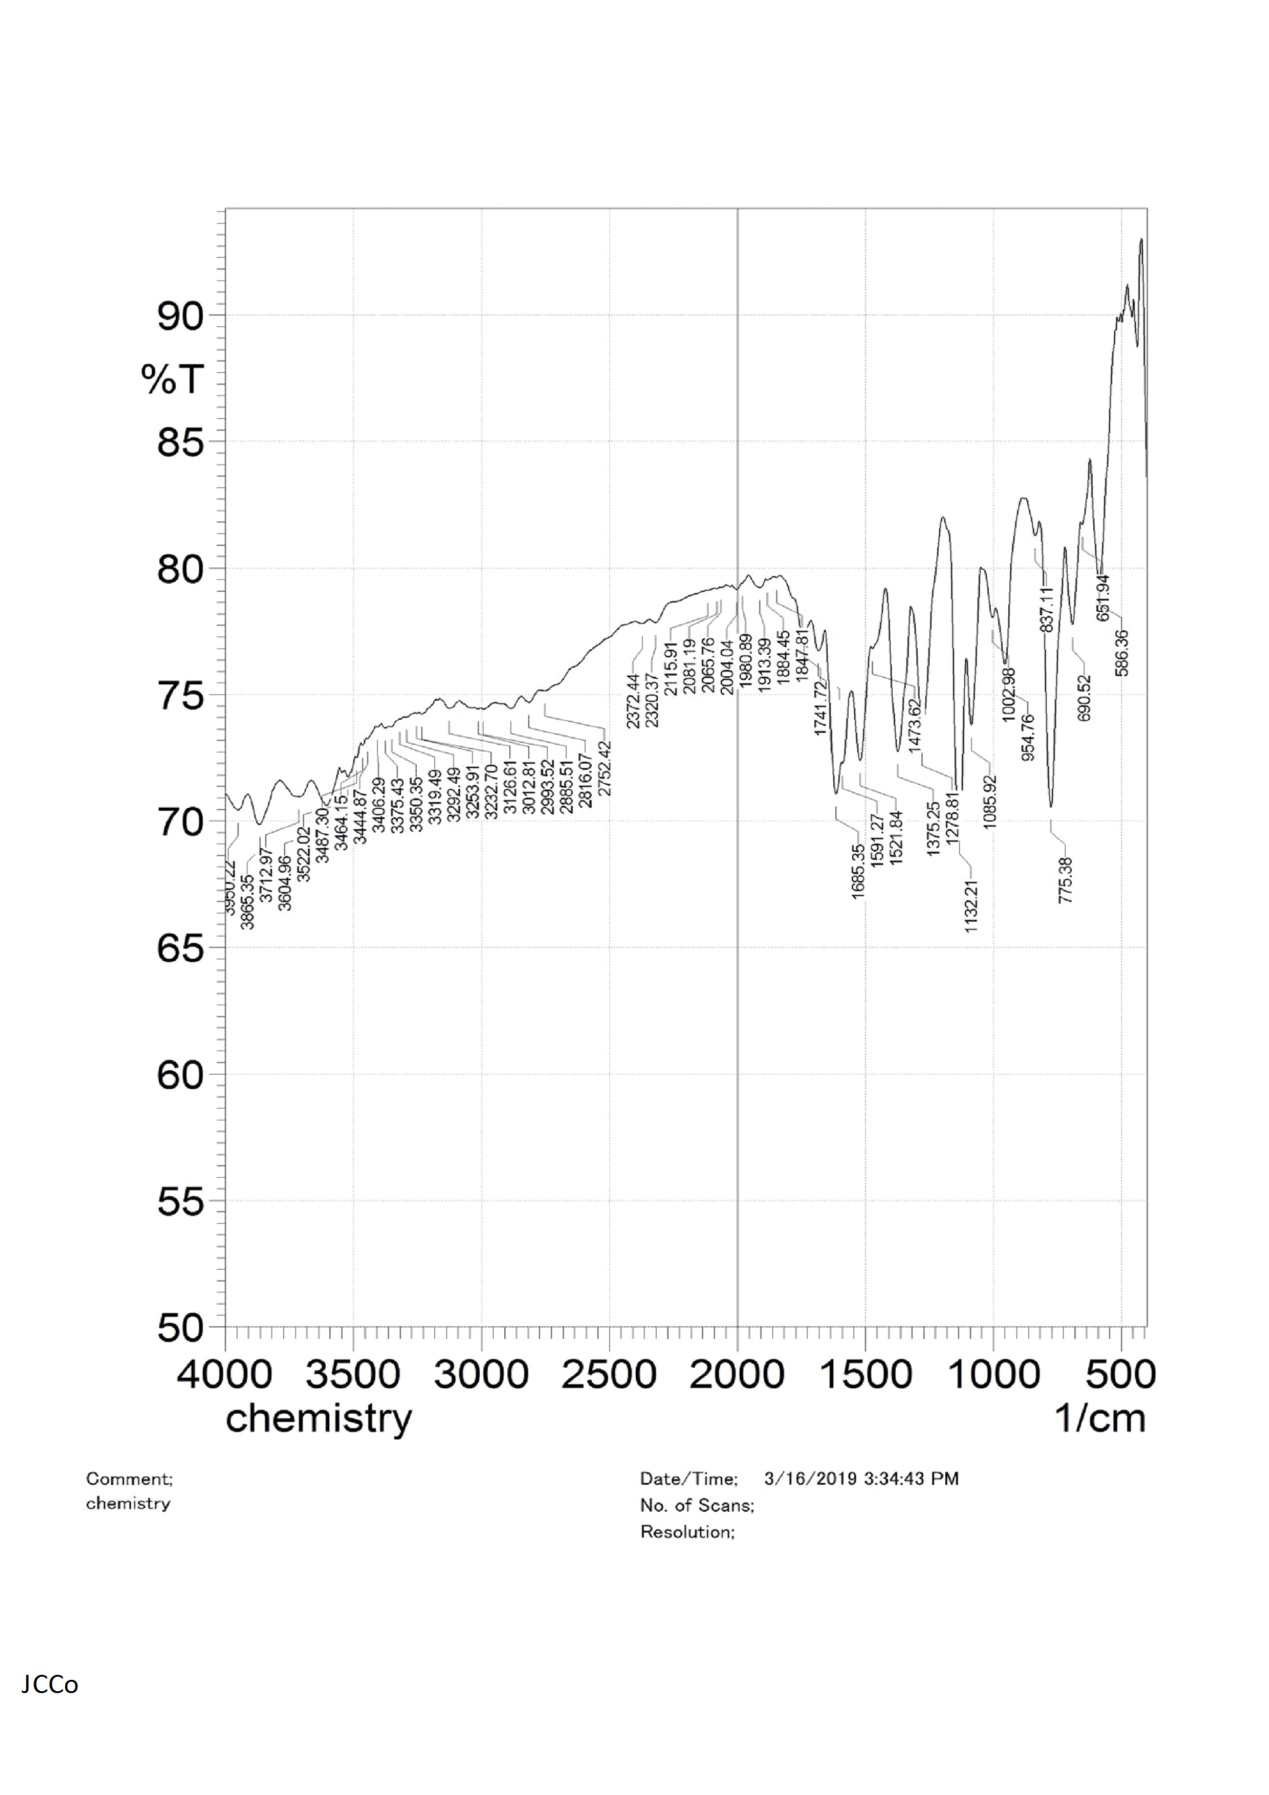


**Fig. S6** FT-IR spectrum of [Zn(SPA)2(NO3)2] complex


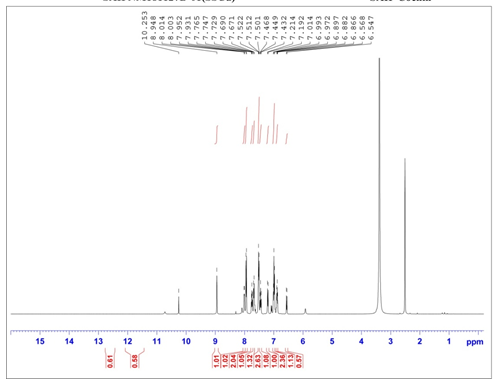


**Fig. S7** NMR spectrum of Schiff base ligand (SPA)

**
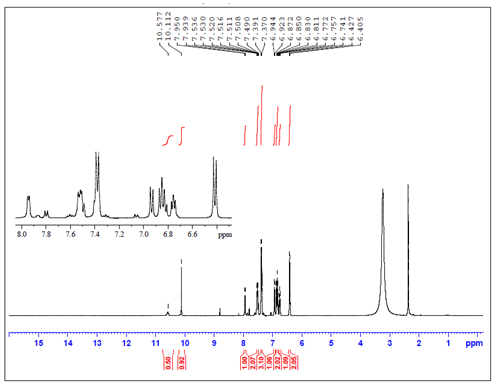
**

**Fig. S8** NMR spectrum of [Zn(SPA)2(NO3)2] complex

**Fig. S9** Diffractogram of Schiff base ligand (SPA)

**Fig. 10** Diffractogram of [Zn(SPA)2(NO3)2]


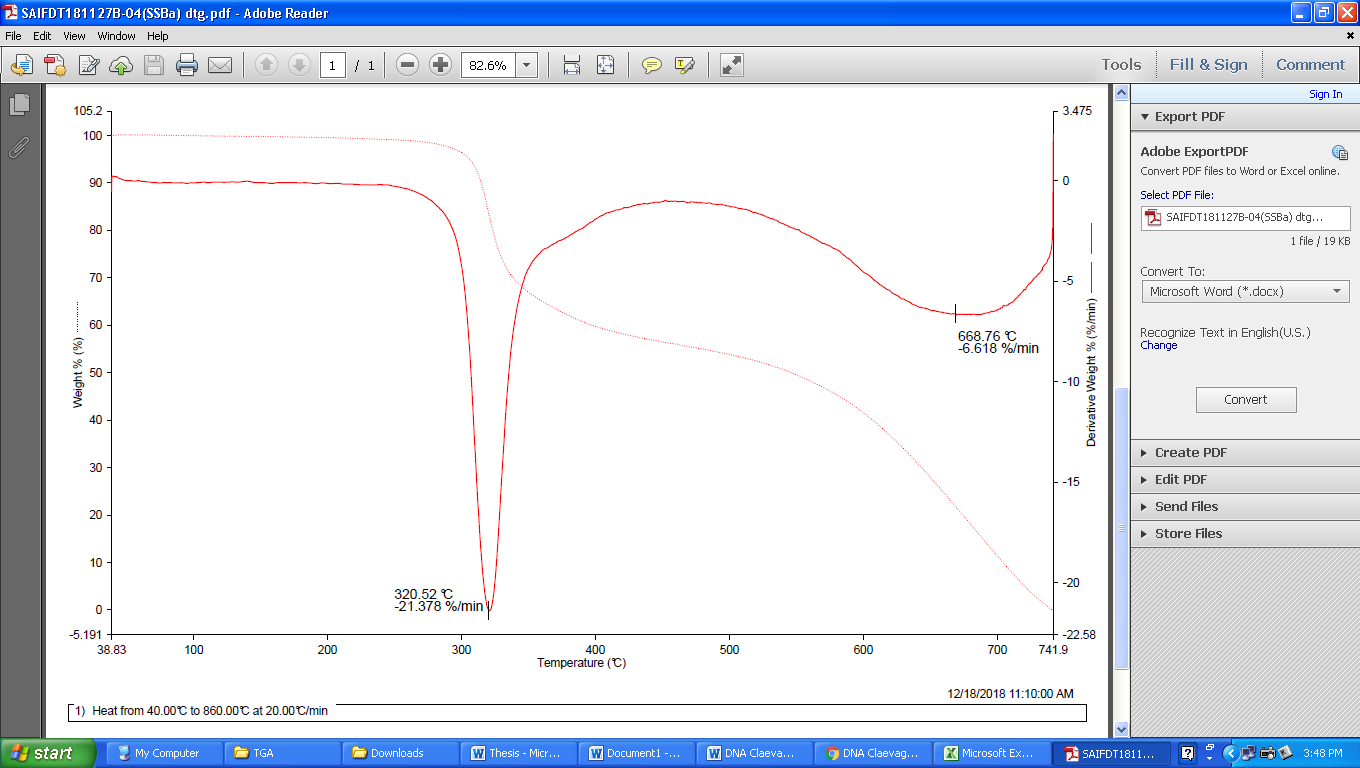


**Fig. 11** TGA and DTA curves of [Zn(SPA)2(NO3)2] complex
